# Supplementary material for: Age differences in diffusion model parameters: a meta-analysis
Source: PubMed Central journal article supplement (PMC8289776; doi:10.1007/s00426-020-01371-8), 2020-06-13
Supplement: 426_2020_1371_MOESM2_ESM.pdf [file 426_2020_1371_MOESM2_ESM.pdf]

Table S1

*Description of task and condition per effect size included in the final analysis*

| Task type  | Label                                  | Task description                              | Experimental condition                     |
|------------|----------------------------------------|-----------------------------------------------|--------------------------------------------|
| Perceptual | Allen, Lien, Ruthruff, & Voss (2014)   | Green and red discrimination in go/no-go task |                                            |
|            | Kühn et al. (2011) 1                   | Discrimination of vowels vs. consonants       | Before daily cognitive training (100 days) |
|            | Kühn et al. (2011) 2                   | Discrimination of vowels vs. consonants       | After 100 days of training                 |
|            | Kühn et al. (2011) 3                   | Discrimination of odd vs. even numbers        | Before daily cognitive training (100 days) |
|            | Kühn et al. (2011) 4                   | Discrimination of odd vs. even numbers        | After 100 days of training                 |
|            | Ratcliff (2008) 1                      | Numerosity discrimination                     | 31-35 dots                                 |
|            | Ratcliff (2008) 2                      | Numerosity discrimination                     | 36-40 dots                                 |
|            | Ratcliff (2008) 3                      | Numerosity discrimination                     | 41-45 dots                                 |
|            | Ratcliff (2008) 4                      | Numerosity discrimination                     | 46-50 dots                                 |
|            | Ratcliff (2008) 5                      | Numerosity discrimination                     | 51-55 dots                                 |
|            | Ratcliff (2008) 6                      | Numerosity discrimination                     | 56-60 dots                                 |
|            | Ratcliff (2008) 7                      | Numerosity discrimination                     | 61-65 dots                                 |
|            | Ratcliff (2008) 8                      | Numerosity discrimination                     | 66-70 dots                                 |
|            | Ratcliff, Thapar, & McKoon (2006) 1    | Brightness discrimination                     |                                            |
|            | Ratcliff, Thapar, & McKoon (2006) 2    | Letter discrimination                         |                                            |
|            | Ratcliff, Thapar, & McKoon (2006) 3    | Numerosity discrimination                     |                                            |
|            | Ratcliff, Thapar, & McKoon (2010) 1    | Numerosity discrimination                     | 31-35 & 66-70 asterisks                    |
|            | Ratcliff, Thapar, & McKoon (2010) 2    | Numerosity discrimination                     | 36-40 & 61-65 asterisks                    |
|            | Ratcliff, Thapar, & McKoon (2010) 3    | Numerosity discrimination                     | 41-45 & 56-60 asterisks                    |
|            | Ratcliff, Thapar, & McKoon (2010) 4    | Numerosity discrimination                     | 46-50 & 51-55 asterisks                    |
|            | Spaniol, Voss, Bowen, & Grady (2011) 1 | Color discrimination                          | Control stimulus; gain association         |
|            | Spaniol, Voss, Bowen, & Grady (2011) 2 | Color discrimination                          | Control stimulus; loss association         |
|            | Spaniol, Voss, Bowen, & Grady (2011) 3 | Color discrimination                          | Neutral stimulus; gain association         |
|            | Spaniol, Voss, Bowen, & Grady (2011) 4 | Color discrimination                          | Neutral stimulus; loss association         |
|            | Spaniol, Voss, Bowen, & Grady (2011) 5 | Color discrimination                          | Valent stimulus; gain association          |

| Task type        | Label                                      | Task description                                                 | Experimental condition            |
|------------------|--------------------------------------------|------------------------------------------------------------------|-----------------------------------|
| Perceptual       | Spaniol, Voss, Bowen, & Grady (2011) 6     | Color discrimination                                             | Valent stimulus; loss association |
|                  | Thapar, Ratcliff, & McKoon (2003) 1        | Letter discrimination                                            | Stimulus duration: 10ms           |
|                  | Thapar, Ratcliff, & McKoon (2003) 2        | Letter discrimination                                            | Stimulus duration: 20ms           |
|                  | Thapar, Ratcliff, & McKoon (2003) 3        | Letter discrimination                                            | Stimulus duration: 30ms           |
|                  | Thapar, Ratcliff, & McKoon (2003) 4        | Letter discrimination                                            | Stimulus duration: 40ms           |
| Lexical decision | Ball & Aschenbrenner (2018) 1              | Lexical decision task with monitoring of prospective memory cues | Focus on ongoing task             |
|                  | Ball & Aschenbrenner (2018) 2              | Lexical decision task with monitoring of prospective memory cues | Focus on prospective memory cues  |
|                  | Dirk et al. (2017) 1                       | Lexical decision task                                            | Non-words                         |
|                  | Dirk et al. (2017) 2                       | Lexical decision task                                            | Words                             |
|                  | Ratcliff, Thapar, & McKoon (2010) 1        | Lexical decision task                                            | High frequency words              |
|                  | Ratcliff, Thapar, & McKoon (2010) 2        | Lexical decision task                                            | Low frequency words               |
|                  | Ratcliff, Thapar, & McKoon (2010) 3        | Lexical decision task                                            | Non-words                         |
|                  | Ratcliff, Thapar, & McKoon (2010) 4        | Lexical decision task                                            | Very low frequency words          |
|                  | Ratcliff, Thapar, Gomez, & McKoon (2004) 1 | Lexical decision task                                            | Exp 1: High frequency words       |
|                  | Ratcliff, Thapar, Gomez, & McKoon (2004) 2 | Lexical decision task                                            | Exp 1: Low frequency words        |
|                  | Ratcliff, Thapar, Gomez, & McKoon (2004) 3 | Lexical decision task                                            | Exp 1: Non-words                  |
|                  | Ratcliff, Thapar, Gomez, & McKoon (2004) 4 | Lexical decision task                                            | Exp 1: Very low frequency words   |
|                  | Ratcliff, Thapar, Gomez, & McKoon (2004) 5 | Lexical decision task                                            | Exp 2: High frequency words       |
|                  | Ratcliff, Thapar, Gomez, & McKoon (2004) 6 | Lexical decision task                                            | Exp 2: Low frequency words        |
|                  | Ratcliff, Thapar, Gomez, & McKoon (2004) 7 | Lexical decision task                                            | Exp 2: Non-words                  |
|                  | Ratcliff, Thapar, Gomez, & McKoon (2004) 8 | Lexical decision task                                            | Exp 2: Very low frequency words   |

| Task type                  | Label                        | Task description                                      | Experimental condition                   |
|----------------------------|------------------------------|-------------------------------------------------------|------------------------------------------|
| Memory                     | Huff & Aschenbrenner (2018)  | Word recognition                                      |                                          |
|                            | Kapucu (2010) 1              | Word recognition with and without delay of 20 minutes | Lure words, delay, negative valence      |
|                            | Kapucu (2010) 2              | Word recognition with and without delay of 20 minutes | Lure words, delay, neutral valence       |
|                            | Kapucu (2010) 3              | Word recognition with and without delay of 20 minutes | Lure words, delay, positive valence      |
|                            | Kapucu (2010) 4              | Word recognition with and without delay of 20 minutes | Lure words, no delay, negative valence   |
|                            | Kapucu (2010) 5              | Word recognition with and without delay of 20 minutes | Lure words, no delay, neutral valence    |
|                            | Kapucu (2010) 6              | Word recognition with and without delay of 20 minutes | Lure words, no delay, positive valence   |
|                            | Kapucu (2010) 7              | Word recognition with and without delay of 20 minutes | Target words, delay, negative valence    |
|                            | Kapucu (2010) 8              | Word recognition with and without delay of 20 minutes | Target words, delay, neutral valence     |
|                            | Kapucu (2010) 9              | Word recognition with and without delay of 20 minutes | Target words, delay, positive valence    |
|                            | Kapucu (2010) 10             | Word recognition with and without delay of 20 minutes | Target words, no delay, negative valence |
|                            | Kapucu (2010) 11             | Word recognition with and without delay of 20 minutes | Target words, no delay, neutral valence  |
|                            | Kapucu (2010) 12             | Word recognition with and without delay of 20 minutes | Target words, no delay, positive valence |
|                            | Kordella (2009) 1            | Sentence memory                                       | Exp 2: Sentence recognition              |
|                            | Kordella (2009) 2            | Sentence memory                                       | Exp 3: Source memory                     |
|                            | McKoon & Ratcliff (2012) 1   | Associative word recognition                          | Intact from related word pairs           |
|                            | McKoon & Ratcliff (2012) 2   | Associative word recognition                          | Intact from non-related word pairs       |
| McKoon & Ratcliff (2012) 3 | Associative word recognition | Rearranged from non-related word pairs                |                                          |
| McKoon & Ratcliff (2012) 4 | Associative word recognition | Rearranged from related word pairs                    |                                          |
| McKoon & Ratcliff (2012) 5 | Word recognition             | High frequency words, new                             |                                          |
| McKoon & Ratcliff (2012) 6 | Word recognition             | High frequency words, old                             |                                          |

| Task type | Label                               | Task description                                                 | Experimental condition                     |
|-----------|-------------------------------------|------------------------------------------------------------------|--------------------------------------------|
| Memory    | McKoon & Ratcliff (2012) 7          | Word recognition                                                 | Low frequency words, new                   |
|           | McKoon & Ratcliff (2012) 8          | Word recognition                                                 | Low frequency words, old                   |
|           | McKoon & Ratcliff (2012) 9          | Word recognition                                                 | Primed from non-related word pairs         |
|           | McKoon & Ratcliff (2012) 10         | Word recognition                                                 | Primed from related pairs                  |
|           | McKoon & Ratcliff (2012) 11         | Word recognition                                                 | Primes                                     |
|           | McKoon & Ratcliff (2012) 12         | Word recognition                                                 | Unprimed from non-related word pairs       |
|           | McKoon & Ratcliff (2012) 13         | Word recognition                                                 | Unprimed from related word pairs           |
|           | McKoon & Ratcliff (2013) 1          | Word recognition after reading sentences with related inferences | Control                                    |
|           | McKoon & Ratcliff (2013) 2          | Word recognition after reading sentences with related inferences | Filler from control sentence               |
|           | McKoon & Ratcliff (2013) 3          | Word recognition after reading sentences with related inferences | Filler from predicting sentence            |
|           | McKoon & Ratcliff (2013) 4          | Word recognition after reading sentences with related inferences | New word                                   |
|           | McKoon & Ratcliff (2013) 5          | Word recognition after reading sentences with related inferences | Predicting                                 |
|           | McKoon & Ratcliff (2013) 6          | Word recognition after reading sentences with related inferences | Prime for control sentence                 |
|           | McKoon & Ratcliff (2013) 7          | Word recognition after reading sentences with related inferences | Prime for predicting sentence              |
|           | McKoon & Ratcliff (2013) 8          | Word recognition after reading sentences with related inferences | Word from filler sentence                  |
|           | Ratcliff, Thapar, & McKoon (2004) 1 | Word recognition                                                 | High frequency words presented once        |
|           | Ratcliff, Thapar, & McKoon (2004) 2 | Word recognition                                                 | High frequency words presented three times |
|           | Ratcliff, Thapar, & McKoon (2004) 3 | Word recognition                                                 | Low frequency words presented once         |
|           | Ratcliff, Thapar, & McKoon (2004) 4 | Word recognition                                                 | Low frequency words presented three times  |
|           | Ratcliff, Thapar, & McKoon (2004) 5 | Word recognition                                                 | New high frequency words                   |
|           | Ratcliff, Thapar, & McKoon (2004) 6 | Word recognition                                                 | New low frequency words                    |
|           | Ratcliff, Thapar, & McKoon (2004) 7 | Word recognition                                                 | New very low frequency words               |
|           | Ratcliff, Thapar, & McKoon (2004) 8 | Word recognition                                                 | Very low frequency words presented once    |

| Task type | Label                                | Task description             | Experimental condition                         |
|-----------|--------------------------------------|------------------------------|------------------------------------------------|
| Memory    | Ratcliff, Thapar, & McKoon (2004) 9  | Word recognition             | Very low frequency words presented three times |
|           | Ratcliff, Thapar, & McKoon (2006)    | Word recognition             |                                                |
|           | Ratcliff, Thapar, & McKoon (2010) 1  | Word recognition             | High frequency words presented once            |
|           | Ratcliff, Thapar, & McKoon (2010) 2  | Word recognition             | High frequency words presented twice           |
|           | Ratcliff, Thapar, & McKoon (2010) 3  | Word recognition             | Low frequency words presented once             |
|           | Ratcliff, Thapar, & McKoon (2010) 4  | Word recognition             | Low frequency words presented twice            |
|           | Ratcliff, Thapar, & McKoon (2010) 5  | Word recognition             | New high frequency words                       |
|           | Ratcliff, Thapar, & McKoon (2010) 6  | Word recognition             | New low frequency words                        |
|           | Ratcliff, Thapar, & McKoon (2011) 7  | Associative word recognition | High frequency words from intact pairs         |
|           | Ratcliff, Thapar, & McKoon (2011) 8  | Associative word recognition | High frequency words from rearranged words     |
|           | Ratcliff, Thapar, & McKoon (2011) 9  | Associative word recognition | Low frequency words from intact pairs          |
|           | Ratcliff, Thapar, & McKoon (2011) 10 | Associative word recognition | Low frequency words from rearranged words      |
|           | Ratcliff, Thapar, & McKoon (2011) 11 | Word recognition             | New high frequency words                       |
|           | Ratcliff, Thapar, & McKoon (2011) 12 | Word recognition             | New low frequency words                        |
|           | Ratcliff, Thapar, & McKoon (2011) 13 | Word recognition             | Old high frequency words                       |
|           | Ratcliff, Thapar, & McKoon (2011) 14 | Word recognition             | Old low frequency words                        |
|           | Spaniol, Voss, & Grady (2008) 1      | Item recognition             | Exp 1: New faces with negative valence         |
|           | Spaniol, Voss, & Grady (2008) 2      | Item recognition             | Exp 1: New faces with neutral valence          |
|           | Spaniol, Voss, & Grady (2008) 3      | Item recognition             | Exp 1: New faces with positive valence         |
|           | Spaniol, Voss, & Grady (2008) 4      | Item recognition             | Exp 1: New scenes with negative valence        |
|           | Spaniol, Voss, & Grady (2008) 5      | Item recognition             | Exp 1: New scenes with neutral valence         |
|           | Spaniol, Voss, & Grady (2008) 6      | Item recognition             | Exp 1: New scenes with positive valence        |
|           | Spaniol, Voss, & Grady (2008) 7      | Item recognition             | Exp 1: New words with negative valence         |
|           | Spaniol, Voss, & Grady (2008) 8      | Item recognition             | Exp 1: New words with neutral valence          |
|           | Spaniol, Voss, & Grady (2008) 9      | Item recognition             | Exp 1: New words with positive valence         |
|           | Spaniol, Voss, & Grady (2008) 10     | Item recognition             | Exp 1: Old faces with negative valence         |
|           | Spaniol, Voss, & Grady (2008) 11     | Item recognition             | Exp 1: Old faces with neutral valence          |

| Task type | Label                                  | Task description | Experimental condition                               |
|-----------|----------------------------------------|------------------|------------------------------------------------------|
| Memory    | Spaniol, Voss, & Grady (2008) 12       | Item recognition | Exp 1: Old faces with positive valence               |
|           | Spaniol, Voss, & Grady (2008) 13       | Item recognition | Exp 1: Old scenes with negative valence              |
|           | Spaniol, Voss, & Grady (2008) 14       | Item recognition | Exp 1: Old scenes with neutral valence               |
|           | Spaniol, Voss, & Grady (2008) 15       | Item recognition | Exp 1: Old scenes with positive valence              |
|           | Spaniol, Voss, & Grady (2008) 16       | Item recognition | Exp 1: Old words with negative valence               |
|           | Spaniol, Voss, & Grady (2008) 17       | Item recognition | Exp 1: Old words with neutral valence                |
|           | Spaniol, Voss, & Grady (2008) 18       | Item recognition | Exp 1: Old words with positive valence               |
|           | Spaniol, Voss, & Grady (2008) 19       | Item recognition | Exp 2: New scenes with negative valence              |
|           | Spaniol, Voss, & Grady (2008) 20       | Item recognition | Exp 2: New scenes with neutral valence               |
|           | Spaniol, Voss, & Grady (2008) 21       | Item recognition | Exp 2: New scenes with positive valence              |
|           | Spaniol, Voss, & Grady (2008) 22       | Item recognition | Exp 2: Old scenes with negative valence              |
|           | Spaniol, Voss, & Grady (2008) 23       | Item recognition | Exp 2: Old scenes with neutral valence               |
|           | Spaniol, Voss, & Grady (2008) 24       | Item recognition | Exp 2: Old scenes with positive valence              |
|           | Voskuilen, Ratcliff, & McKoon (2018) 1 | Word recognition | High frequency words presented in training for 1.5 s |
|           | Voskuilen, Ratcliff, & McKoon (2018) 2 | Word recognition | High frequency words presented in training for 5 s   |
|           | Voskuilen, Ratcliff, & McKoon (2018) 3 | Word recognition | Low frequency words presented in training for 1.5 s  |
|           | Voskuilen, Ratcliff, & McKoon (2018) 4 | Word recognition | Low frequency words presented in training for 5 s    |
|           | Voskuilen, Ratcliff, & McKoon (2018) 5 | Word recognition | New low frequency words                              |
